# Supplementary material for: Superior Long-term Survival for Simultaneous Pancreas-Kidney Transplantation as Renal Replacement Therapy: 30-Year Follow-up of a Nationwide Cohort
Source: Oxford University Press journal article supplement (doi:10.2337/dc19-1580), 2019-12-04
Supplement: dc191580supplementarydata.pdf [file dc191580supplementarydata.pdf]

SUPPLEMENTARY DATA

**Supplementary Table 1. Baseline characteristics 2796 type 1 diabetes patients, according to area of residence and type of renal replacement therapy.**

|                                   | Dialysis        |                      | Transplantation |                     |
|-----------------------------------|-----------------|----------------------|-----------------|---------------------|
|                                   | Leiden<br>n=251 | Non-Leiden<br>n=1549 | Leiden<br>n=238 | Non-Leiden<br>n=758 |
| Age at dialysis, y                | 58 ± 13         | 59 ± 13              | 43 ± 10         | 44 ± 10             |
| Age at transplantation, y         |                 |                      | 44 ± 10         | 46 ± 11             |
| Men, %                            | 53              | 53                   | 59              | 63                  |
| Donor age, y                      | -               | -                    | 36 ± 14         | 41 ± 16             |
| Dialysis modality, nr (%)         |                 |                      |                 |                     |
| Haemodialysis                     | 68              | 72                   | 22              | 35                  |
| Peritoneal dialysis               | 32              | 28                   | 21              | 34                  |
| Missing                           | 0               | 0.1                  | 0               | 10                  |
| Pre-emptive Tx, %                 |                 |                      | 57              | 21                  |
| Dialysis vintage, mo <sup>a</sup> | 9 ± 6           | 8 ± 6                | 23 ± 24         | 20 ± 22             |
| Cold ischaemic time, h            | -               | -                    | 15 ± 8          | 16 ± 11             |
| DDKT, nr (%)                      | -               | -                    | 14              | 50                  |
| LDKT, nr (%)                      | -               | -                    | 6               | 20                  |
| SPKT, nr (%)                      | -               | -                    | 80              | 30                  |

<sup>a</sup> Excluding pre-emptive transplant patients

Numbers are presented as mean ± SD or percentage.

DDKT, deceased donor kidney transplant; LDKT, living donor kidney transplant; SPKT, simultaneous pancreas kidney transplantation; Tx, transplantation.

SUPPLEMENTARY DATA

**Supplementary Table 2. Hazard ratios of 10-year mortality of patients transplanted until the year 2000, compared with patients transplanted afterwards.**

|                    | Crude             | Model 1           | Model 2           | Model 3           |
|--------------------|-------------------|-------------------|-------------------|-------------------|
| <b>DDKT</b>        |                   |                   |                   |                   |
| 1986 to 1999 (ref) | 1                 | 1                 | 1                 | 1                 |
| 2000 to 2015       | 0.74 (0.54; 1.03) | 0.62 (0.44; 0.87) | 0.57 (0.40; 0.81) | 0.54 (0.37; 0.78) |
| <b>LDKT</b>        |                   |                   |                   |                   |
| 1986 to 1999 (ref) | 1                 | 1                 | 1                 | 1                 |
| 2000 to 2015       | 0.95 (0.47; 1.90) | 0.58 (0.27; 1.24) | 0.57 (0.27; 1.21) | 0.56 (0.26; 1.19) |
| <b>SPKT</b>        |                   |                   |                   |                   |
| 1986 to 1999 (ref) | 1                 | 1                 | 1                 | 1                 |
| 2000 to 2015       | 0.60 (0.39; 0.94) | 0.51 (0.32; 0.81) | 0.48 (0.30; 0.76) | 0.48 (0.30; 0.76) |

Model 1: Adjusted for recipient age and sex.

Model 2: Model 1, plus adjustment for donor age.

Model 3: Model 2, plus adjustment for dialysis vintage and dialysis modality.

SUPPLEMENTARY DATA

**Supplementary Table 3. Hazard ratios (95%CI) of 10- and 20-year all-cause mortality and death-censored graft failure for kidney transplanted patients living in the Leiden area compared to the non-Leiden area.**

|                                      | Crude             | Model 1           | Model 2           | Model 3           |
|--------------------------------------|-------------------|-------------------|-------------------|-------------------|
| 10-year all-cause mortality          |                   |                   |                   |                   |
| Non-Leiden area (ref)                | 1                 | 1                 | 1                 | 1                 |
| Leiden area                          | 0.47 (0.34; 0.64) | 0.50 (0.37; 0.69) | 0.54 (0.39; 0.73) | 0.56 (0.40; 0.78) |
| 10-year death-censored graft failure |                   |                   |                   |                   |
| Non-Leiden area (ref)                | 1                 | 1                 | 1                 | 1                 |
| Leiden area                          | 0.74 (0.49; 1.11) | 0.73 (0.48; 1.09) | 0.87 (0.57; 1.33) | 0.88 (0.55; 1.39) |
| 20-year all-cause mortality          |                   |                   |                   |                   |
| Non-Leiden area (ref)                | 1                 | 1                 | 1                 | 1                 |
| Leiden area                          | 0.56 (0.44; 0.72) | 0.60 (0.47; 0.78) | 0.63 (0.48; 0.81) | 0.69 (0.52; 0.90) |
| 20-year death-censored graft failure |                   |                   |                   |                   |
| Non-Leiden area (ref)                | 1                 | 1                 | 1                 | 1                 |
| Leiden area                          | 0.69 (0.48; 1.00) | 0.68 (0.47; 0.99) | 0.80 (0.55; 1.16) | 0.79 (0.52; 1.19) |

Model 1: Adjusted for recipient age and sex.

Model 2: Model 1, plus adjustment for donor age.

Model 3: Model 2, plus adjustment for dialysis vintage, dialysis modality, and transplantation era.

SUPPLEMENTARY DATA

**Supplementary Table 4. Hazard ratios (95%CI) of 5-year and 10-year mortality for type 1 diabetes after kidney transplantation compared with dialysis, matched for dialysis vintage.**

|                                | Crude             | Model 1           | Model 2           |
|--------------------------------|-------------------|-------------------|-------------------|
| 5-year mortality               |                   |                   |                   |
| Dialysis (on waiting list)     | 1                 | 1                 | 1                 |
| Dialysis (not on waiting list) | 1.70 (1.50; 1.93) | 1.59 (1.38; 1.83) | 1.54 (1.34; 1.78) |
| Transplantation*               | 0.23 (0.18; 0.30) | 0.24 (0.18; 0.31) | 0.25 (0.19; 0.32) |
| 10-year mortality              |                   |                   |                   |
| Dialysis (on waiting list)     | 1                 | 1                 | 1                 |
| Dialysis (not on waiting list) | 1.62 (1.44; 1.81) | 1.50 (1.32; 1.70) | 1.46 (1.29; 1.66) |
| Transplantation*               | 0.21 (0.17; 0.26) | 0.22 (0.18; 0.28) | 0.23 (0.18; 0.28) |

\*Transplantation included both living kidney donor transplant, or deceased donor transplant with or without simultaneous pancreas transplantation.

Model 1: Adjusted for age and sex.

Model 2: Model 1, plus adjustment for calendar time.

SUPPLEMENTARY DATA

**Supplementary Figure 1. Flow diagram of 2833 type 1 diabetes mellitus (T1-DM) patients with end-stage renal disease, and different types of renal replacement therapy (RRT).**

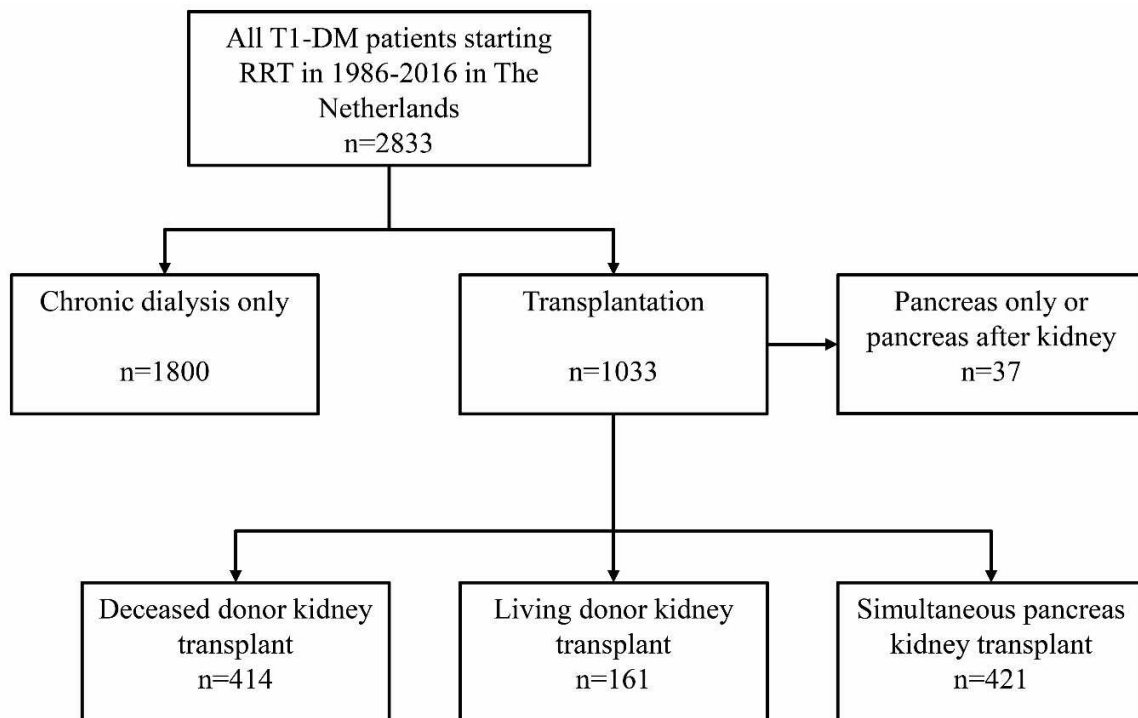

SUPPLEMENTARY DATA

**Supplementary Figure 2. Survival of simultaneous pancreas kidney transplantation (SPKT) patients transplanted in the period 1986-1999 and 2000-2015.**

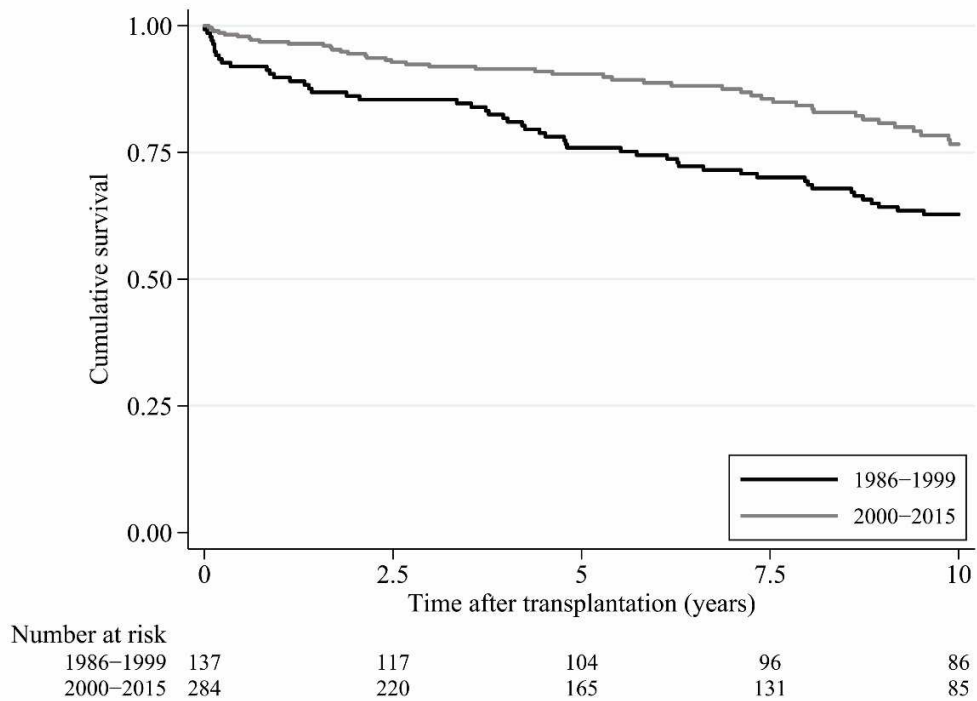

SUPPLEMENTARY DATA

**Supplementary Figure 3. Type 1 diabetes mellitus patient survival conditional on survival of the first year after transplantation, according to transplantation type: living donor kidney transplant (LDKT), deceased donor kidney transplant (DDKT), and simultaneous pancreas kidney transplantation (SPKT). SPKT patients were divided into patients with a functioning pancreatic graft after one year, SPKT(+), and those with pancreatic graft failure in the first year, SPKT(-). Median survival was 8.6 (7.4; 9.7) years for DDKT, 12.0 (8.0; 16.0) years for LDKT, 17.4 (15.4; 19.5) years for SPKT(+), and 10.7 (3.5; 17.9) years for SPKT(-). DDKT, deceased donor kidney transplant; LDKT, living donor kidney transplant; SPKT, simultaneous pancreas kidney transplantation.**

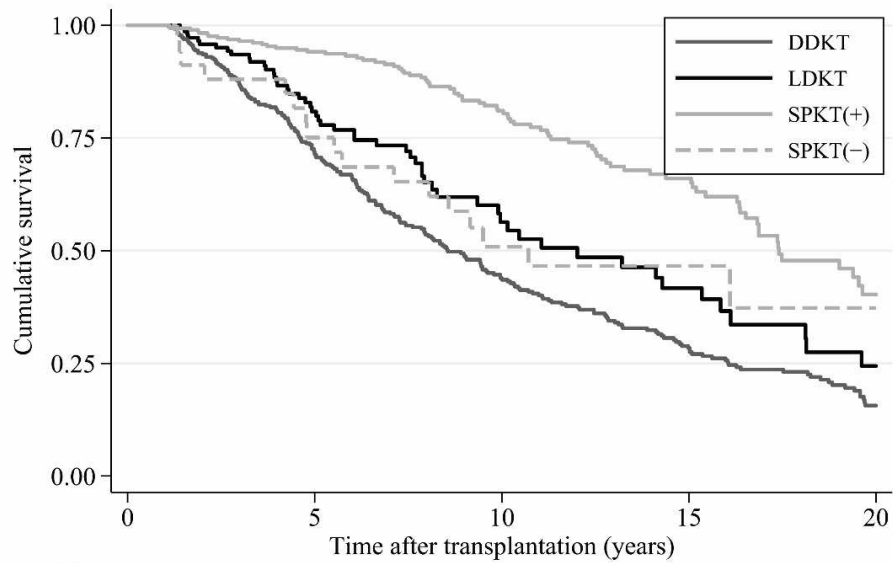

| Number at risk |     |     |     |    |    |  |
|----------------|-----|-----|-----|----|----|--|
| DDKT           | 361 | 230 | 117 | 64 | 23 |  |
| LDKT           | 150 | 81  | 30  | 17 | 7  |  |
| SPKT(+)        | 305 | 217 | 137 | 67 | 20 |  |
| SPKT(-)        | 34  | 23  | 12  | 5  | 4  |  |

SUPPLEMENTARY DATA

**Supplementary Figure 4. Patient survival after start dialysis or kidney transplantation. Each transplanted patient was matched on dialysis vintage with a chronic dialysis patient on the waiting list for transplantation. Median survival was 2.4 (2.1; 2.7) years for dialysis patients, and 11.3 (9.6; 12.9) years for transplanted patients.**

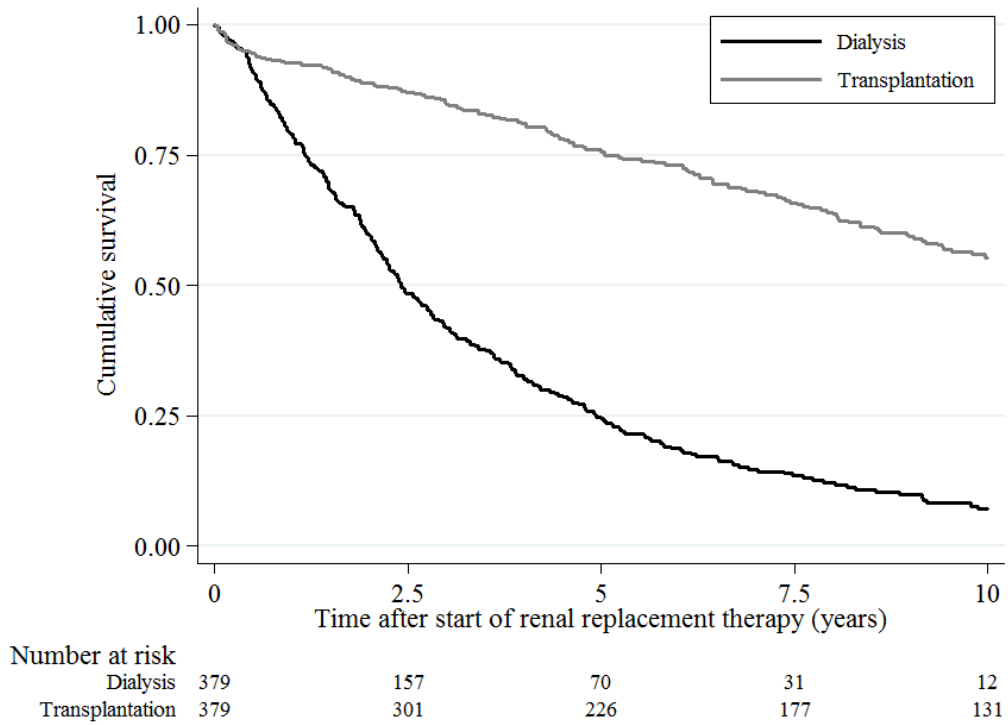



SUPPLEMENTARY DATA

**Appendix: List of Dutch Kidney Transplant Centres and representatives.**

Amsterdam (AMC): prof. dr. Frederike J. Bemelman and (VUmc) dr. Azam Nurmohamed;

Groningen (UMCG): prof. dr. Stefan P. Berger;

Leiden (LUMC): dr. Aiko P. de Vries;

Maastricht: dr. Maarten H.L. Christiaans;

Nijmegen: dr. Luuk B. Hilbrands;

Rotterdam: dr. Dennis A. Hesselink;

Utrecht (UMCU): dr. Arjan D. van Zuilen.
